# Supplementary material
Source: PubMed Central journal article supplement (PMC2878525)
Supplement: supp_M110.107763_jbc.M110.107763-1.pdf [file supp_M110.107763_jbc.M110.107763-1.pdf]

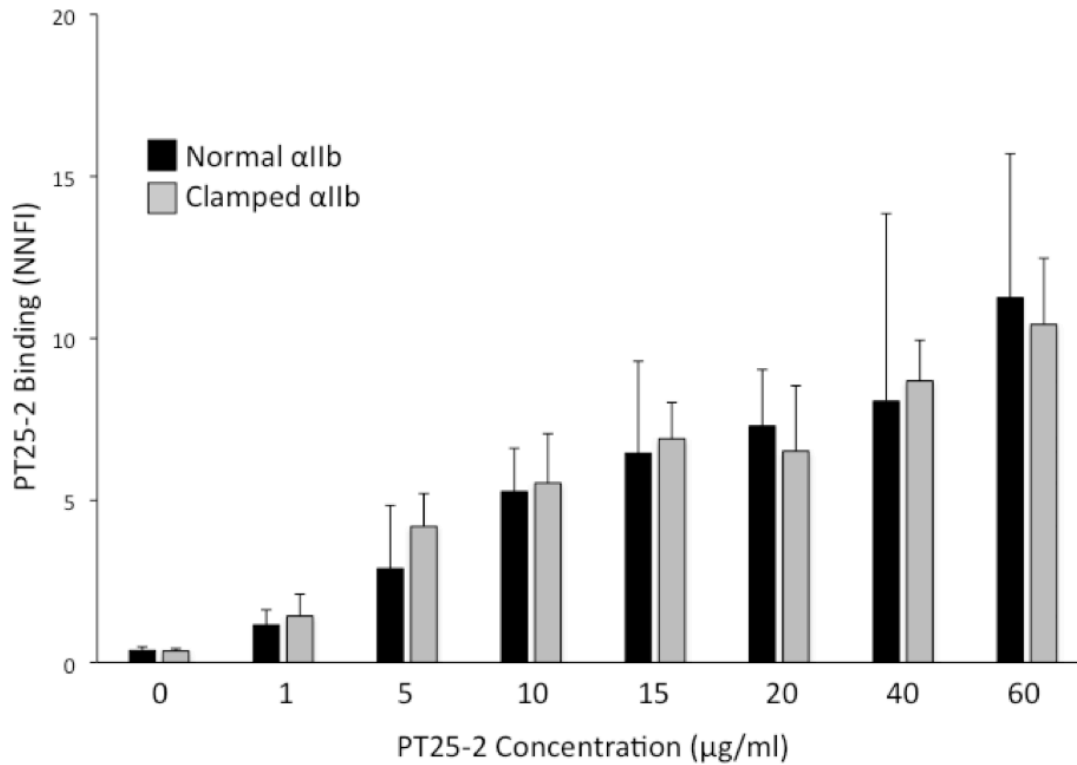

**Supplemental Figure 1. PT25-2 binds similarly to normal and clamped  $\alpha$ IIb $\beta$ 3.** Cells were incubated with Alexa488-PT25-2 for 30 minutes and then binding was assessed on cells immediately after dilution using flow cytometry. Binding was expressed as net normalized fluorescence intensity (NNFI), in which the geometric mean fluorescence intensity (GMFI) after subtracting nonspecific binding was divided by the relative surface receptor expression as judged by the binding of mAb 10E5 (n=3). Nonspecific binding was assessed by measuring the GMFI in the presence of 50X unlabeled antibody at 1, 5, and 10  $\mu$ g/ml Alexa488-PT25-2, and the average increase in signal intensity over this interval was used to calculate the expected contribution of nonspecific binding at higher antibody concentrations.
