# Supplementary material
Source: PubMed Central journal article supplement (PMC2878525)
Supplement: supp_M110.107763_jbc.M110.107763-2.pdf [file supp_M110.107763_jbc.M110.107763-2.pdf]

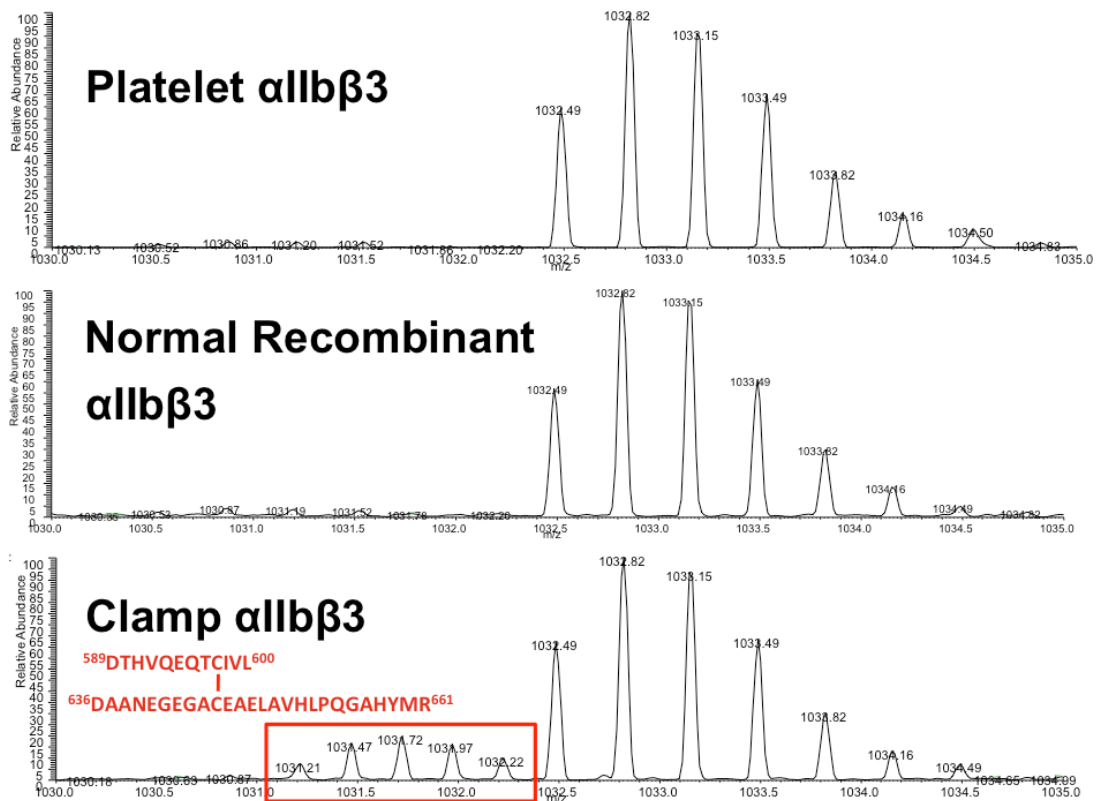

**Supplemental Figure 2. Digestion of clamped  $\alpha$ Ib $\beta$ 3 produces a unique peptide containing the C597-C645 disulfide.** Integrin  $\alpha$ Ib $\beta$ 3 was immunoprecipitated from platelets or cells expressing either normal or clamped  $\alpha$ Ib $\beta$ 3. Purified receptors were then sequentially digested by trypsin and endoproteinase Asp-N and analyzed by LC-MS/MS using a nano-reversed phase column coupled online with an LTQ-Orbitrap mass spectrometer. The peptide identified in the clamped  $\alpha$ Ib $\beta$ 3 (boxed region, sequence shown in red) was not present in the other samples.
